# Supplementary material for: Evaluation of Claw Lesions in Beef Cattle Slaughtered in Northern Portugal: A Preliminary Study
Source: MDPI journal article supplement (doi:10.3390/ani14030514), 2024-02-04

Supplementary

Prevalence (%) of cattle affected with asymmetric claws by sex (a), age (b), hot carcass weight (c), carcass classification (d) and fat coverage (e)

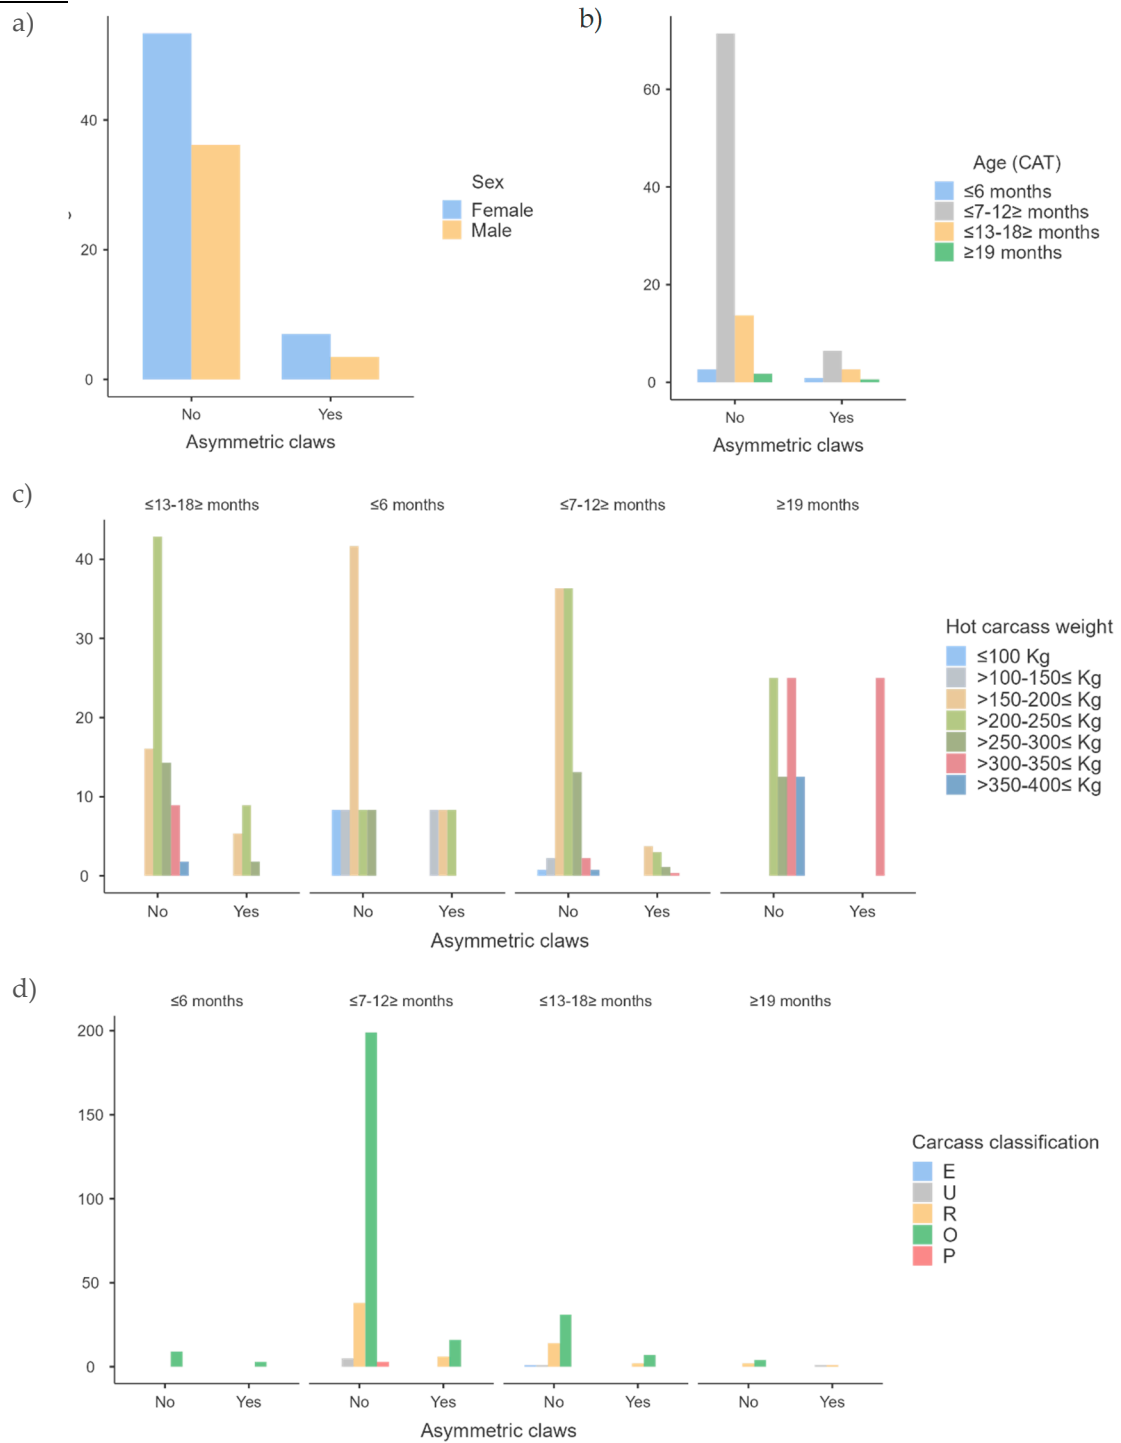

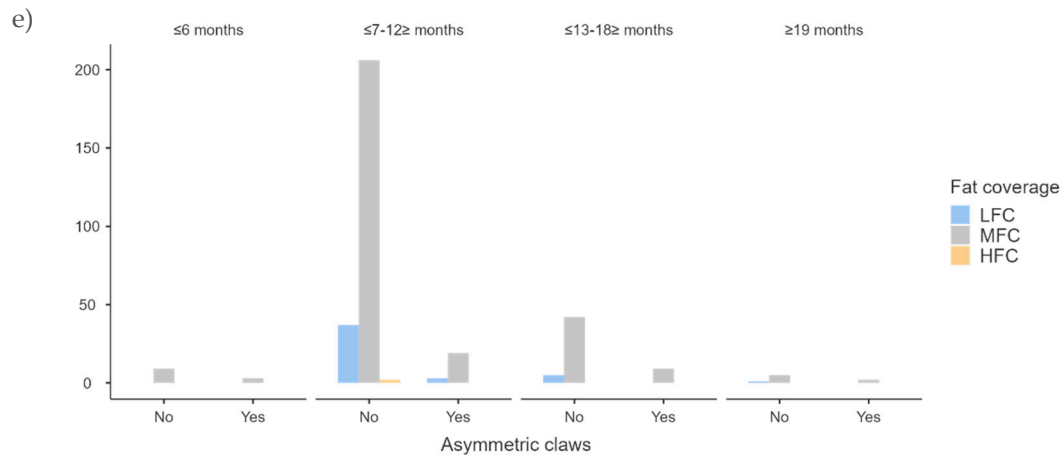

Prevalence (%) of cattle affected by concave dorsal wall by sex (a), age (b), hot carcass weight (c), carcass classification (d) and fat coverage (e)

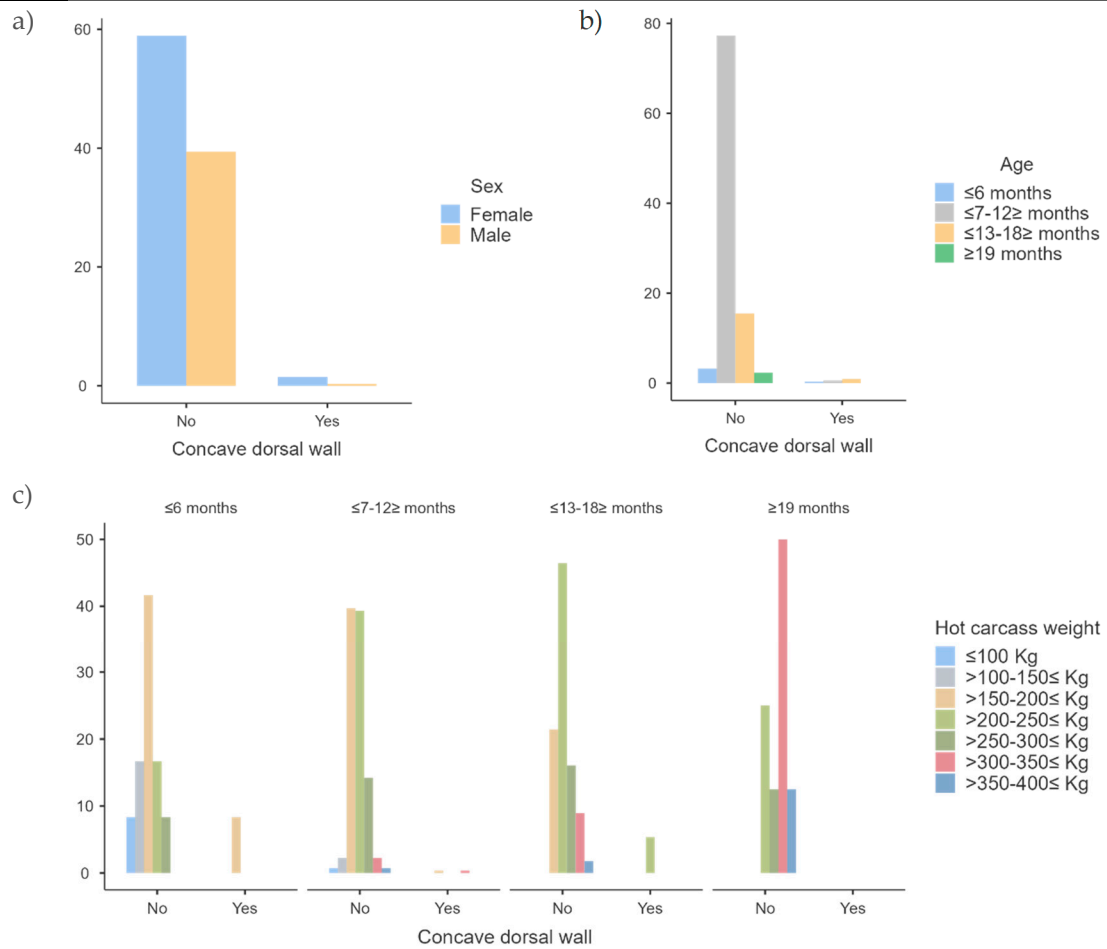

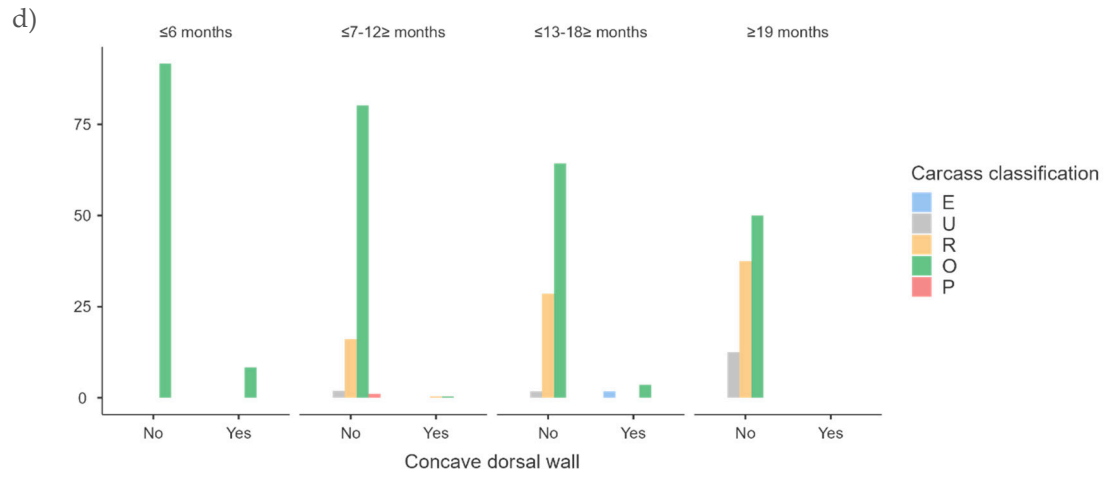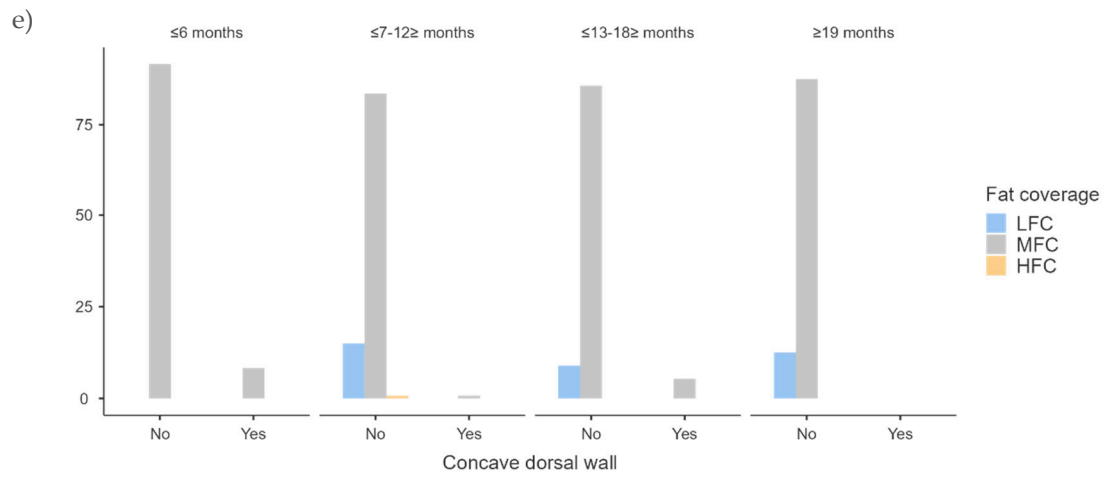

Prevalence (%) of cattle affected by digital dermatitis by sex (a), age (b), hot carcass weight (c), carcass classification (d) and fat coverage (e)

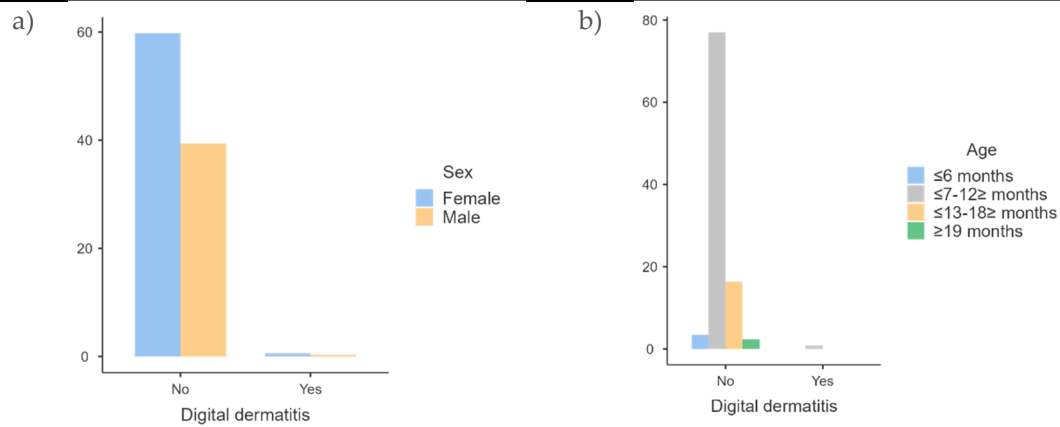

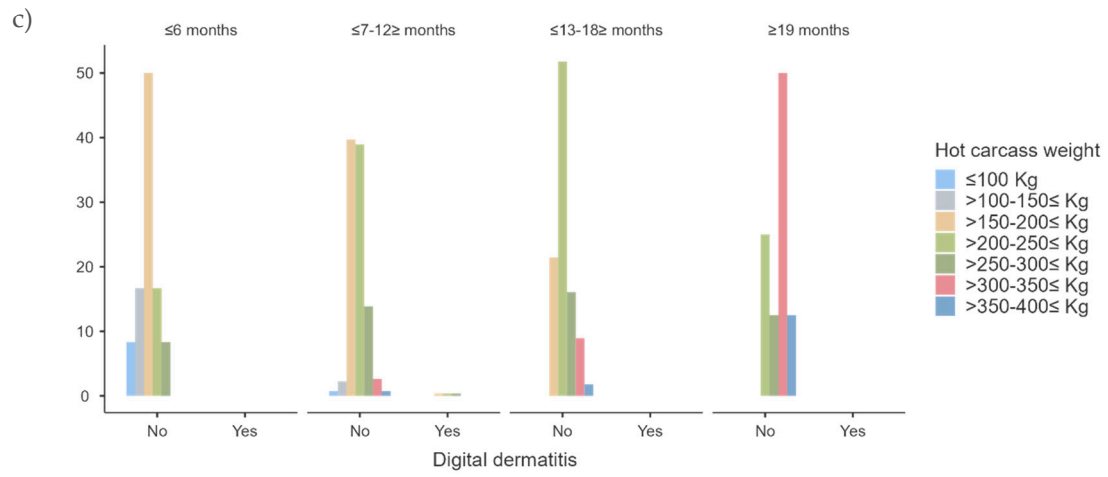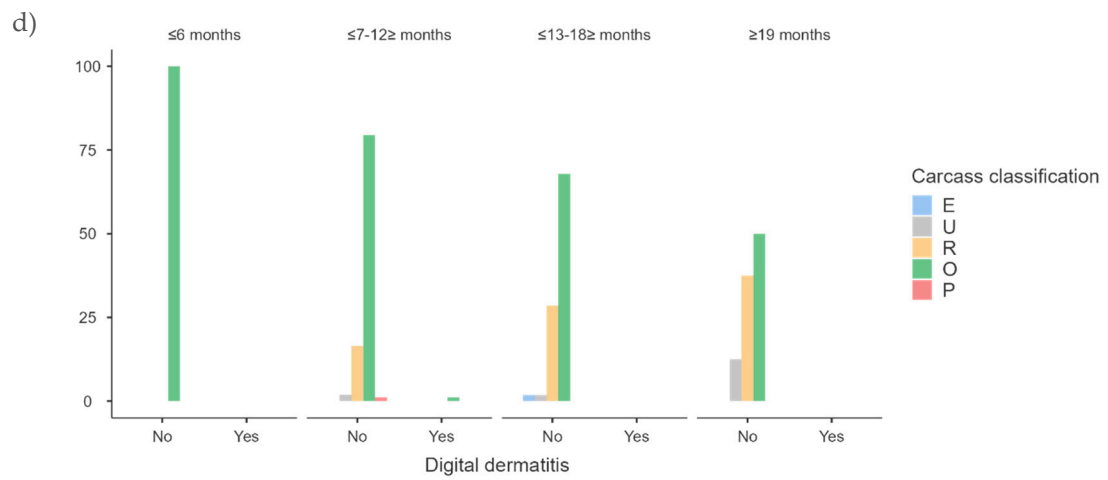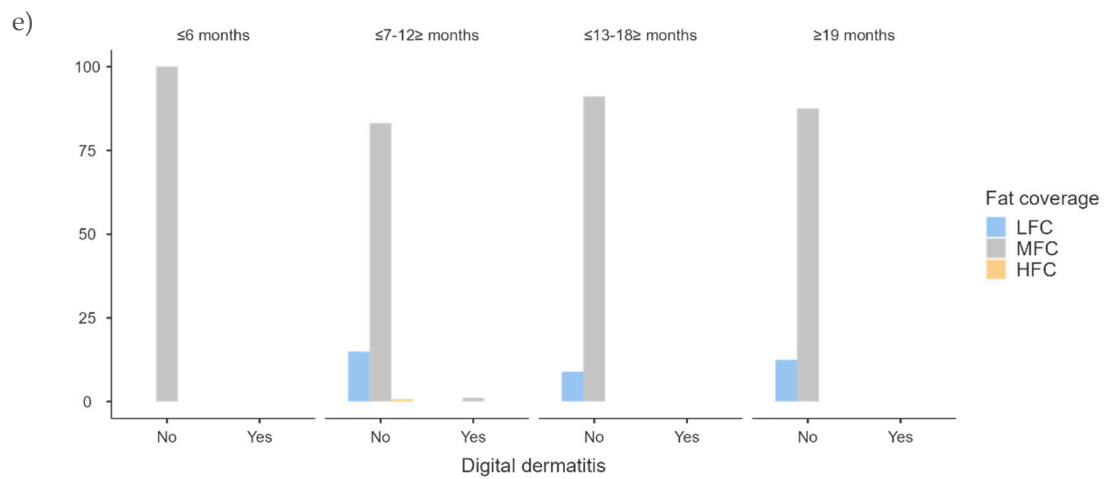

Prevalence (%) of cattle affected by interdigital / superficial dermatitis by sex (a), age (b), hot carcass weight (c), carcass classification (d) and fat coverage (e)

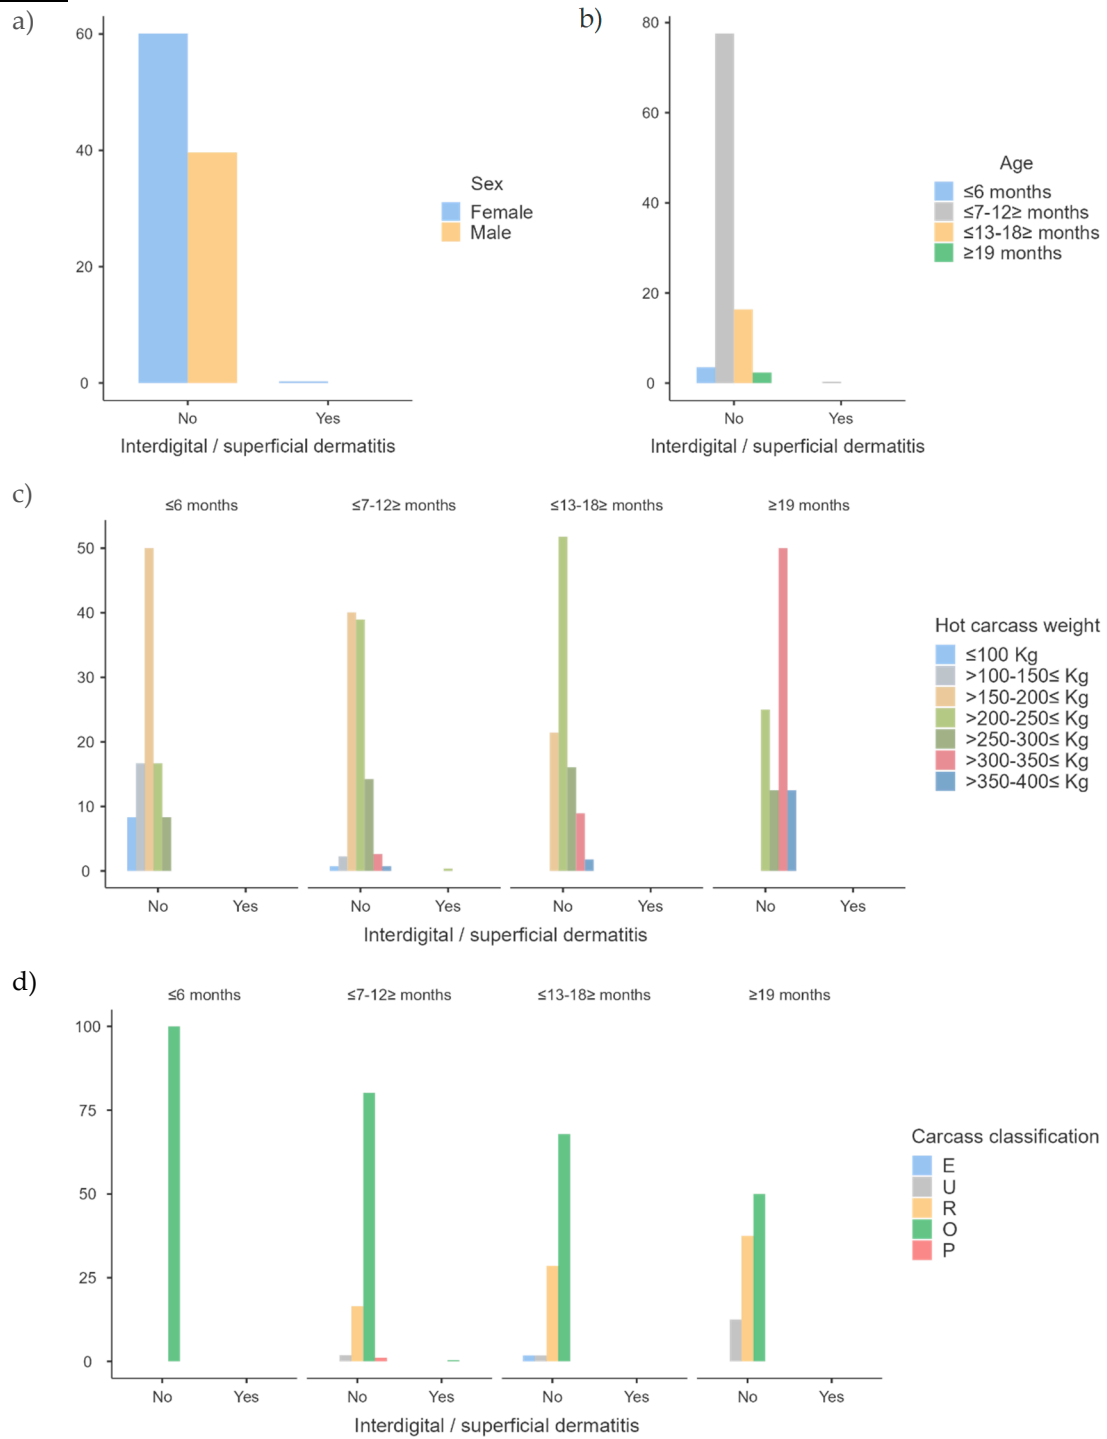

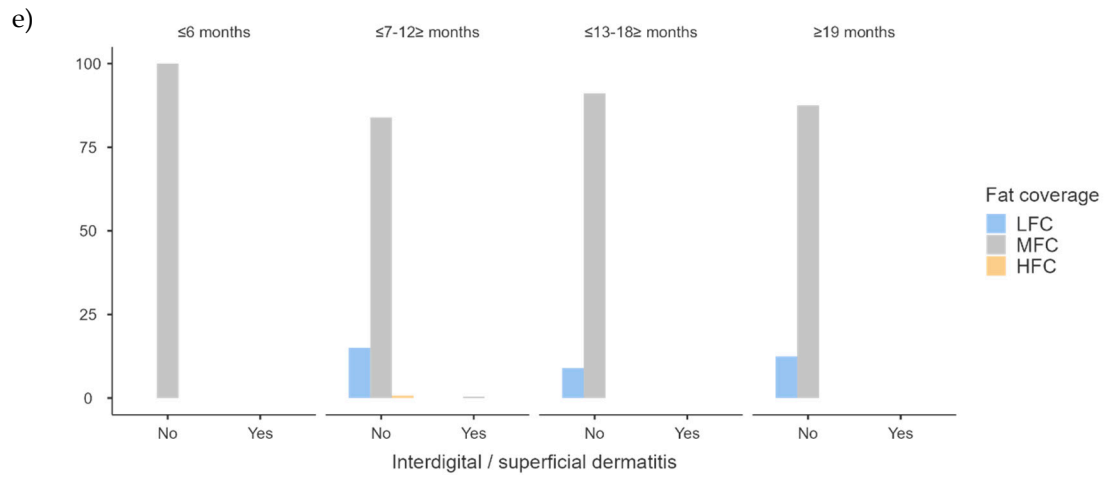

Prevalence (%) of cattle affected by double sole by sex (a), age (b), hot carcass weight (c), carcass classification (d) and fat coverage (e)

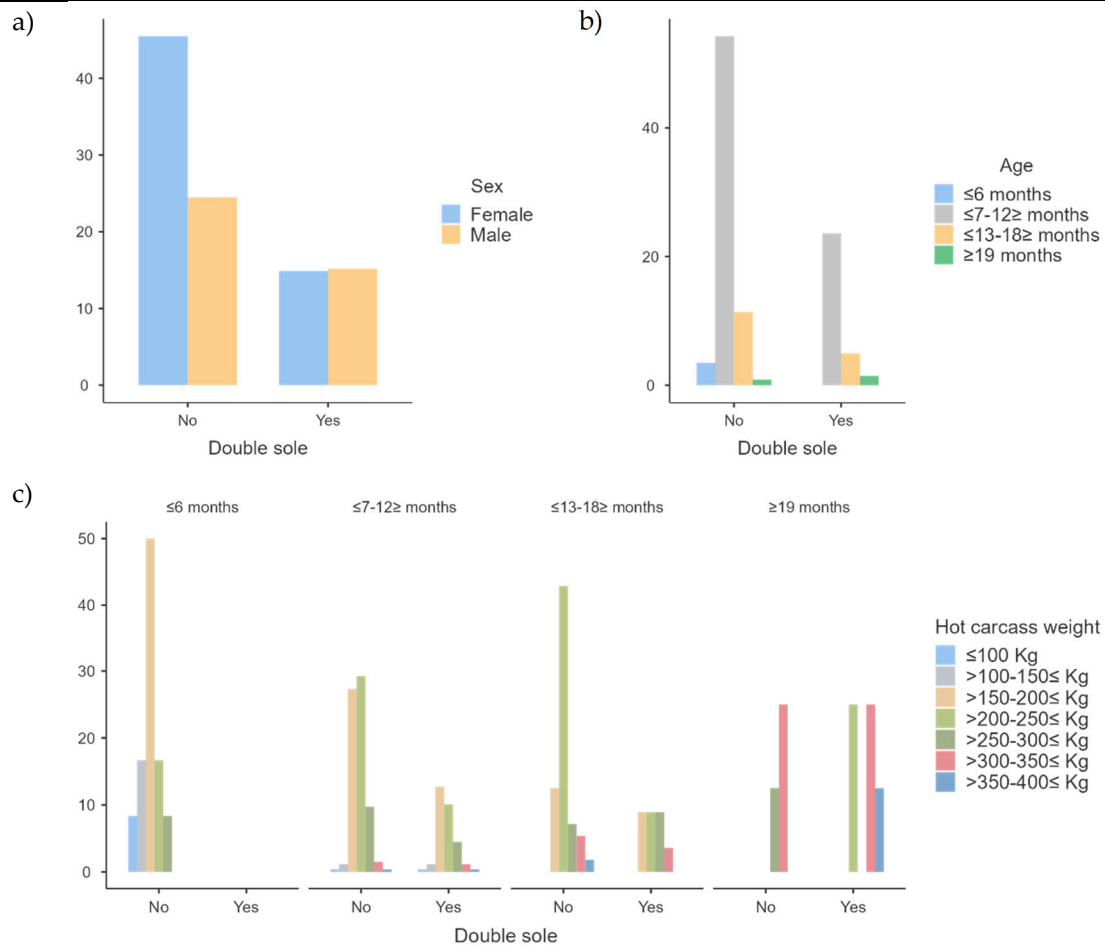

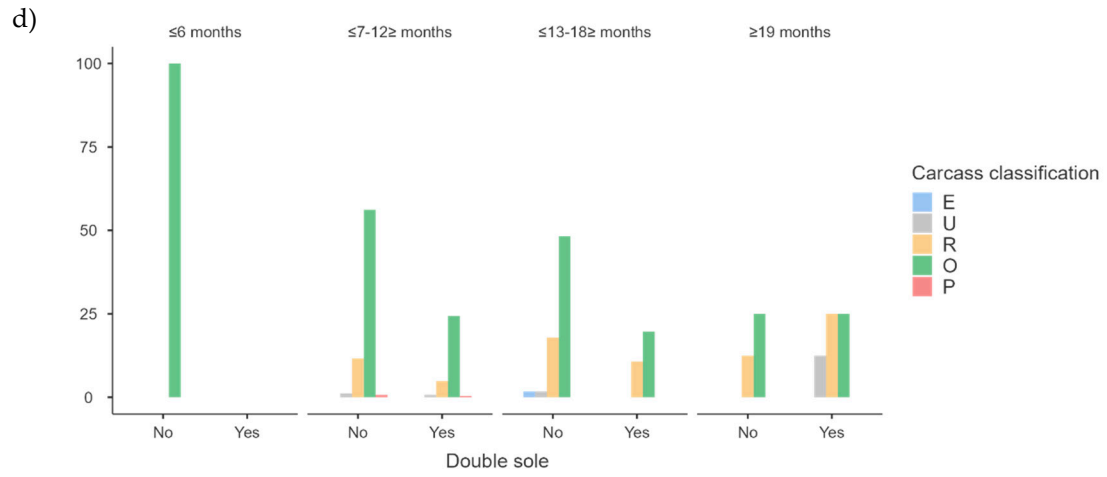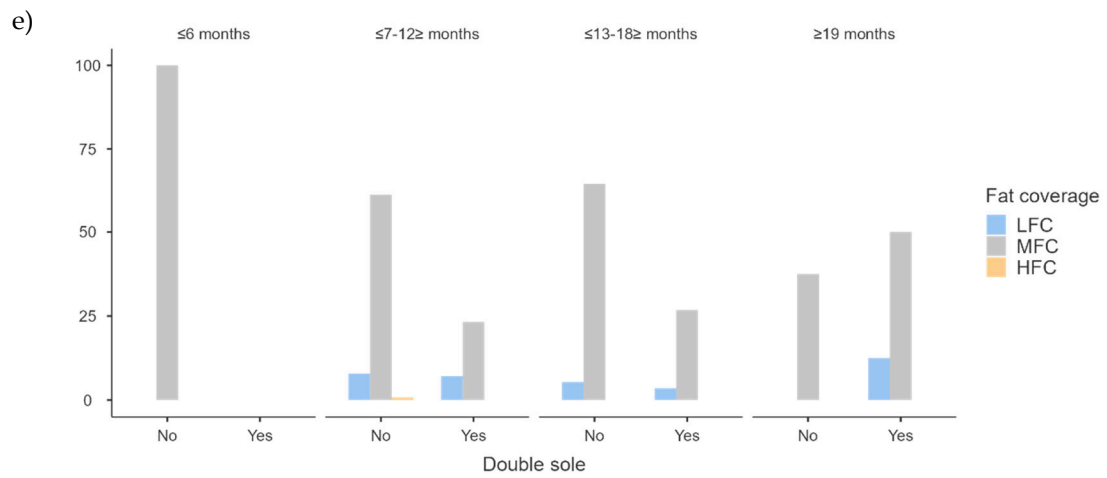

Prevalence (%) of cattle affected by heel horn erosion by sex (a), age (b), hot carcass weight (c), carcass classification (d) and fat coverage (e)

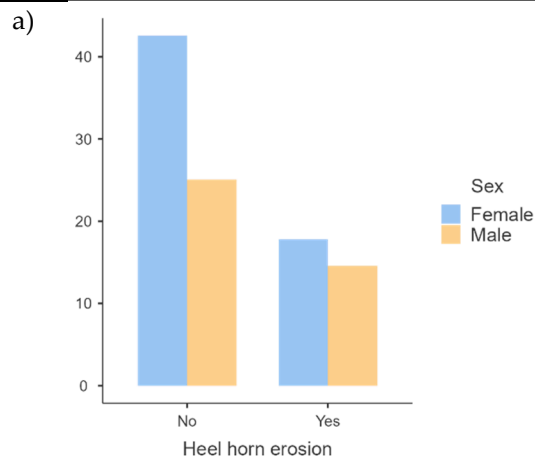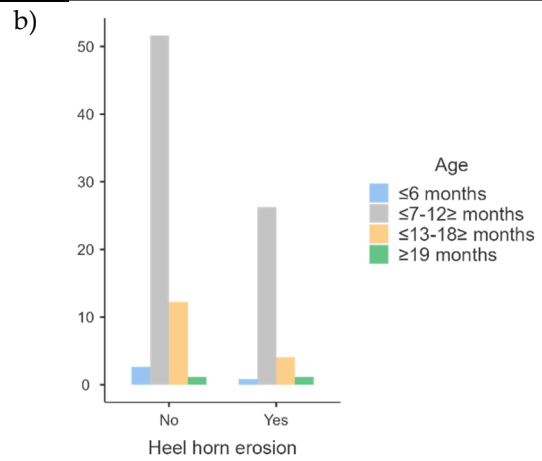

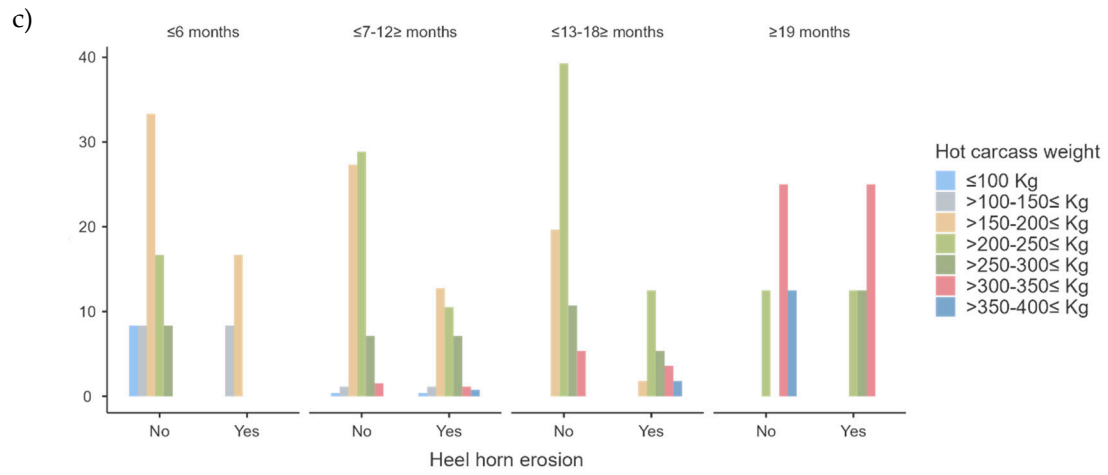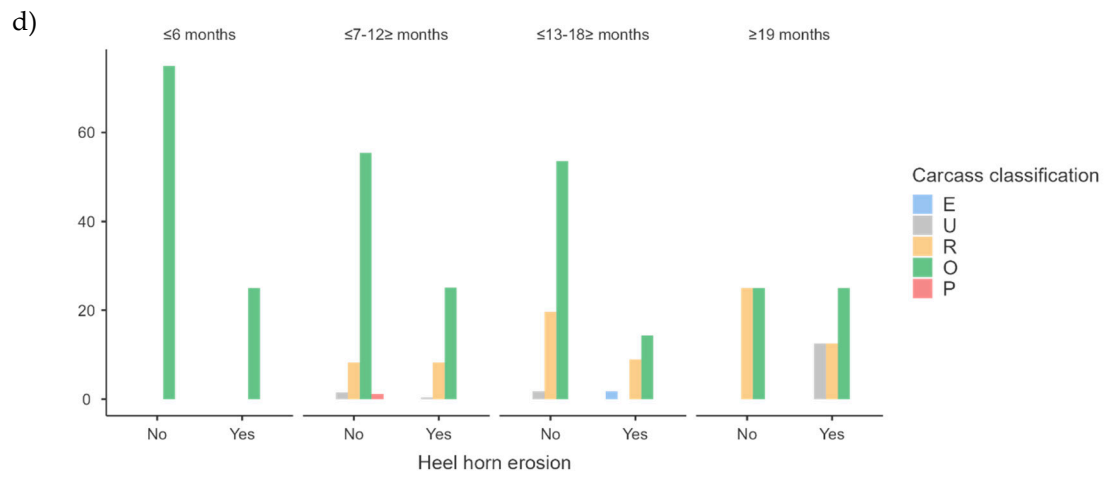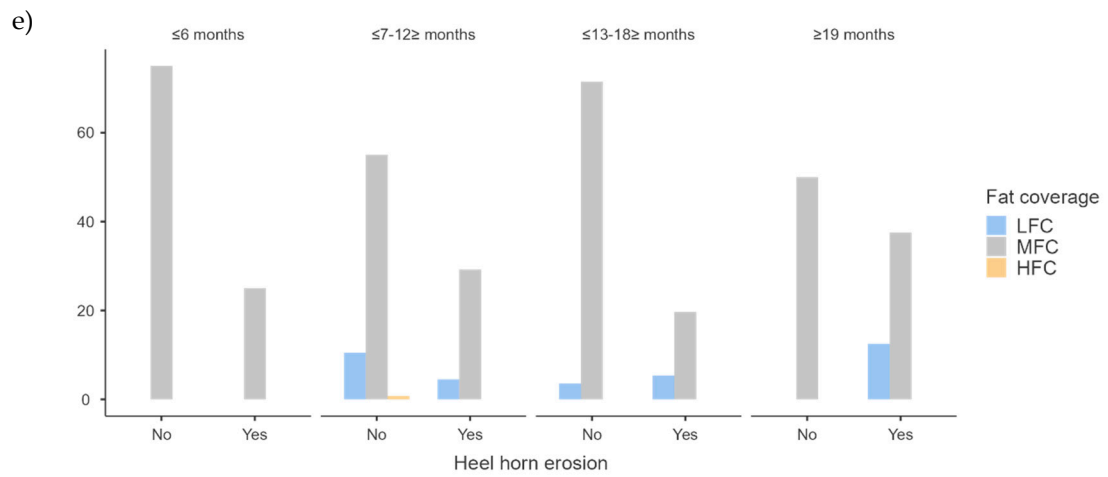



Prevalence (%) of cattle affected by sole ulcer by sex (a), age (b), hot carcass weight (c), carcass classification (d) and fat coverage (e)

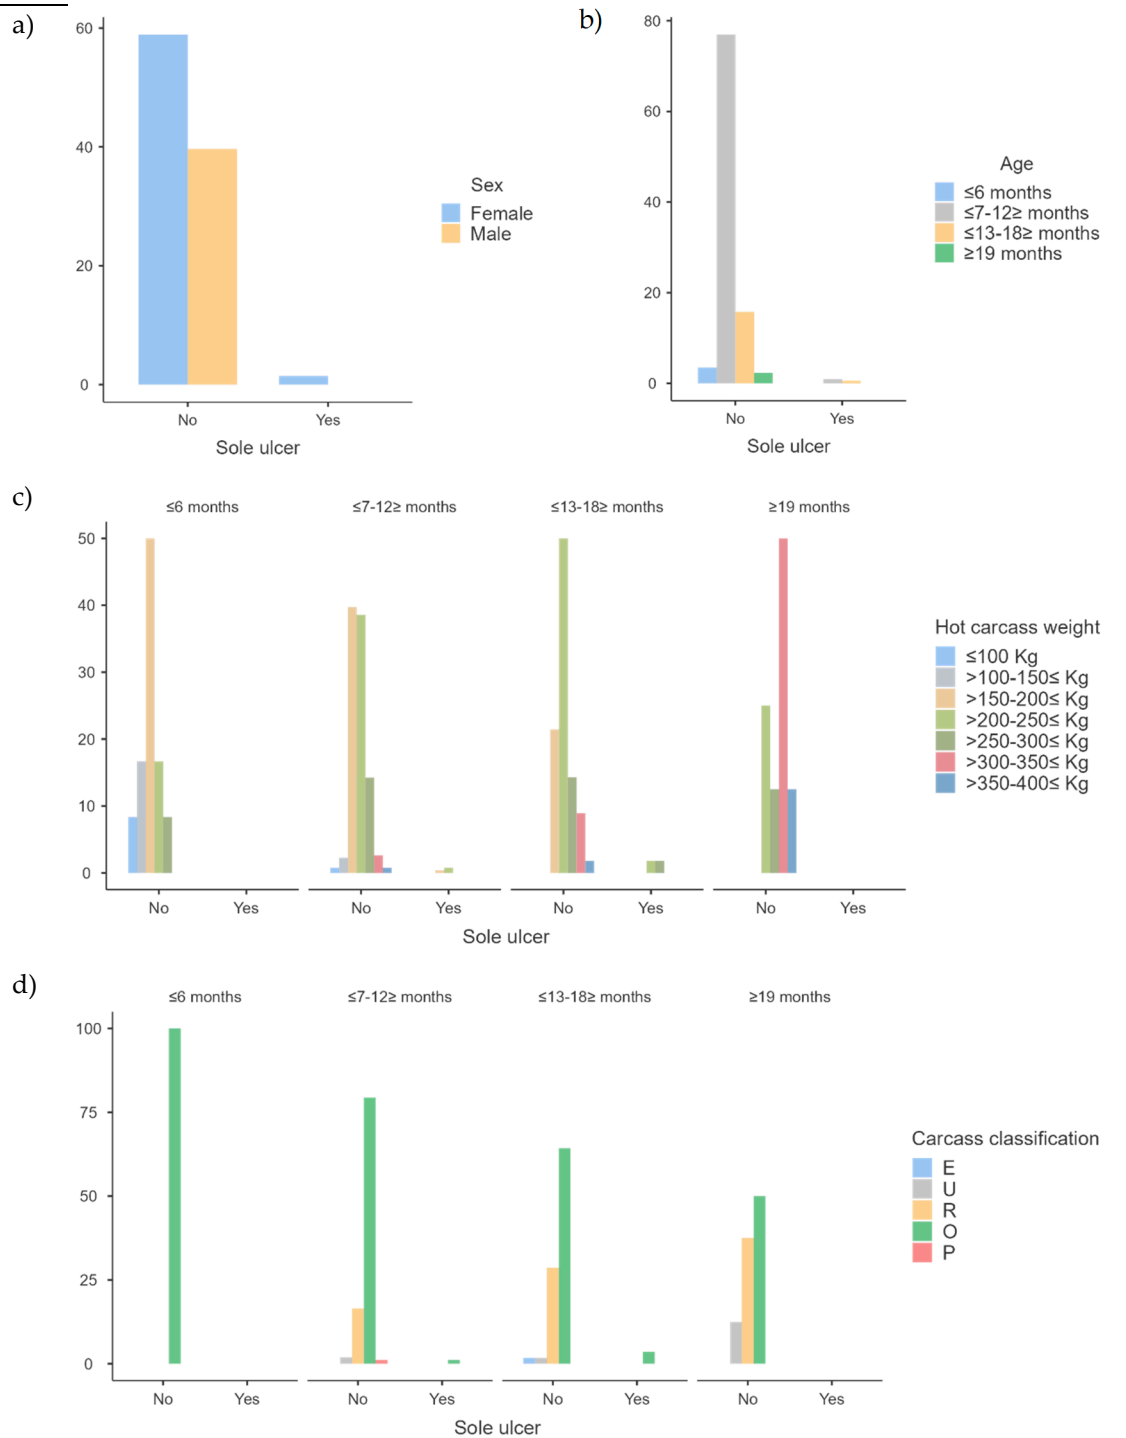

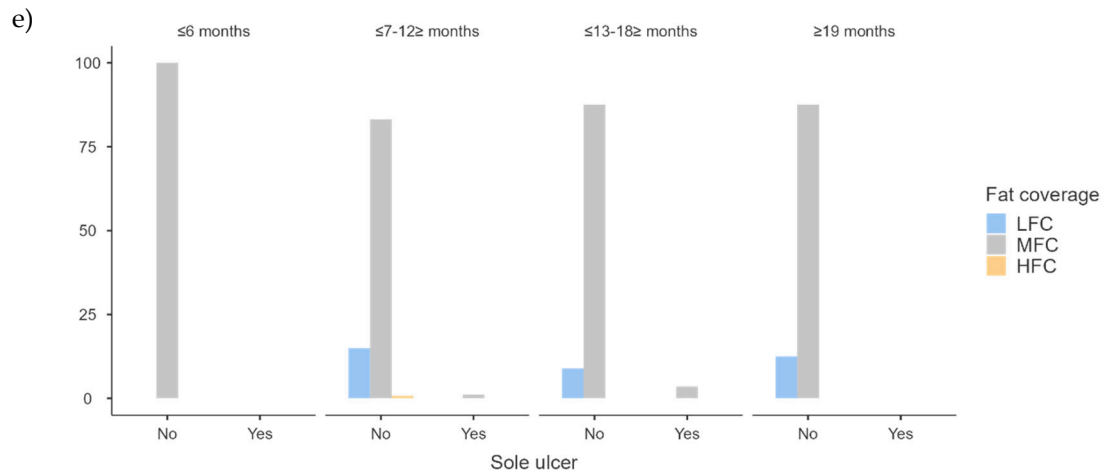

Prevalence (%) of cattle affected by toe ulcer by sex (a), age (b), hot carcass weight (c), carcass classification (d) and fat coverage (e)

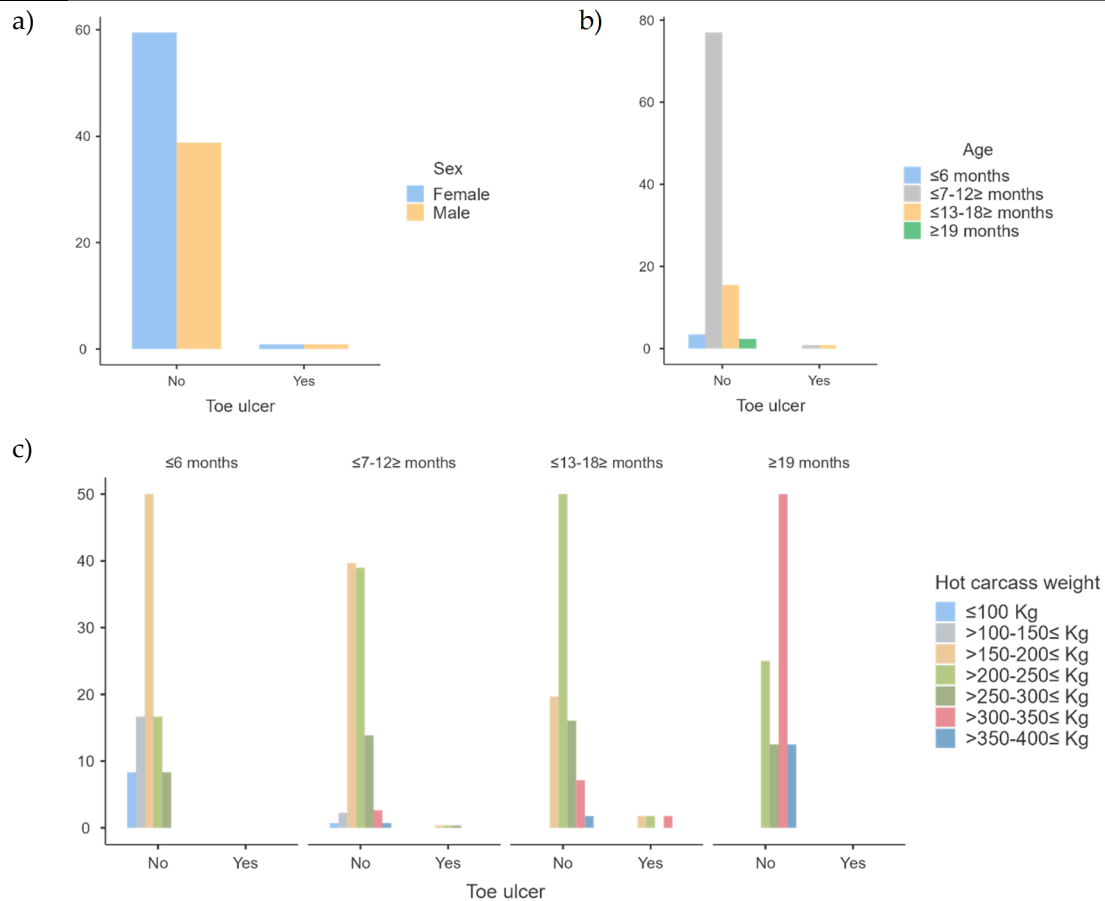

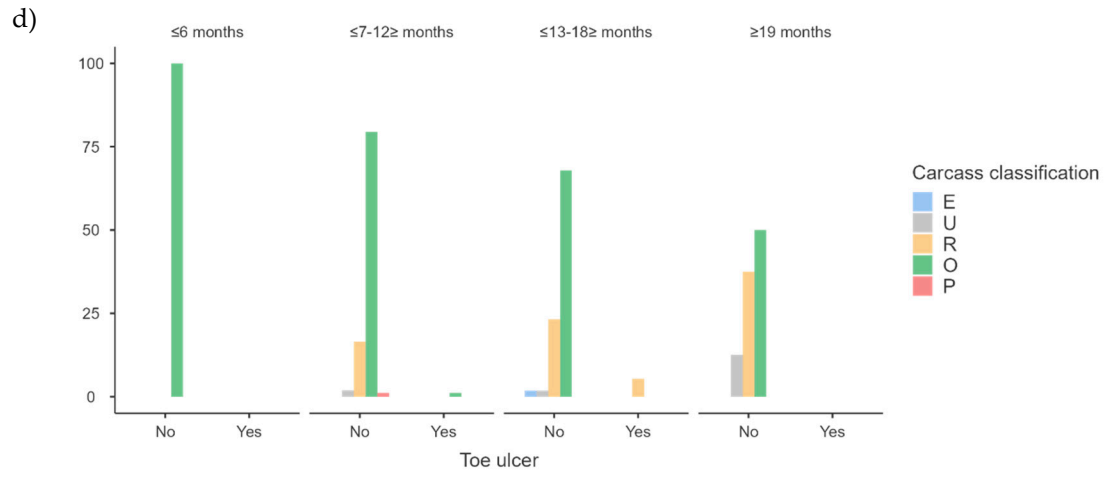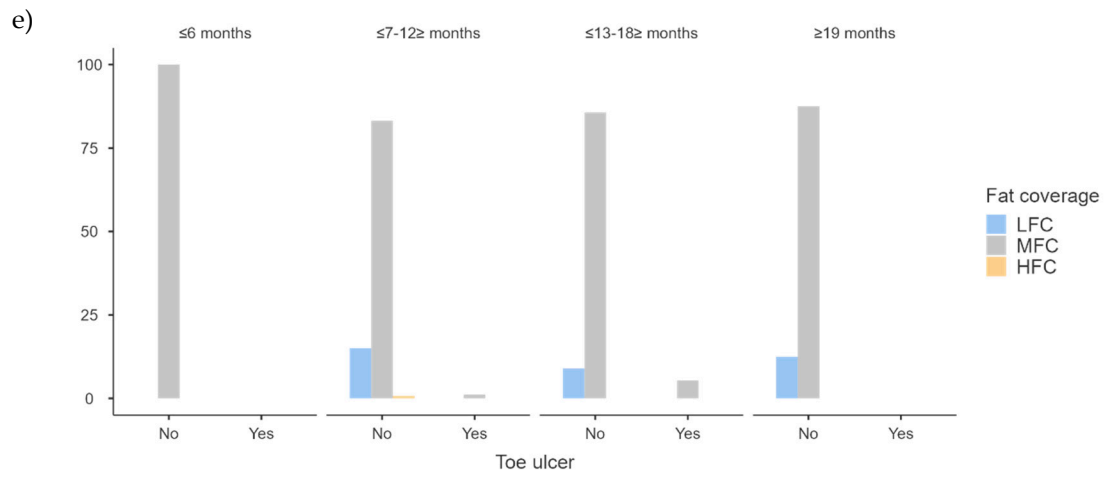

Prevalence (%) of cattle affected by toe necrosis by sex (a), age (b), hot carcass weight (c), carcass classification (d) and fat coverage (e)

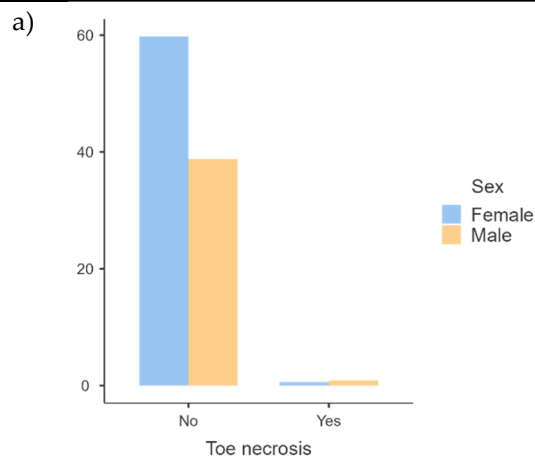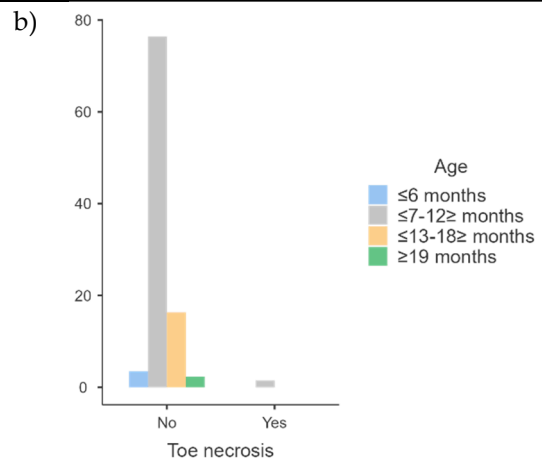

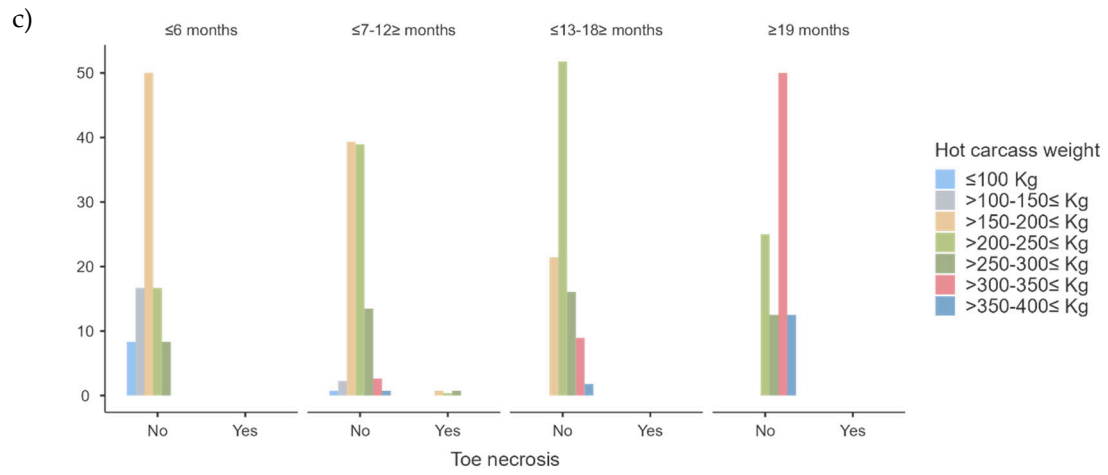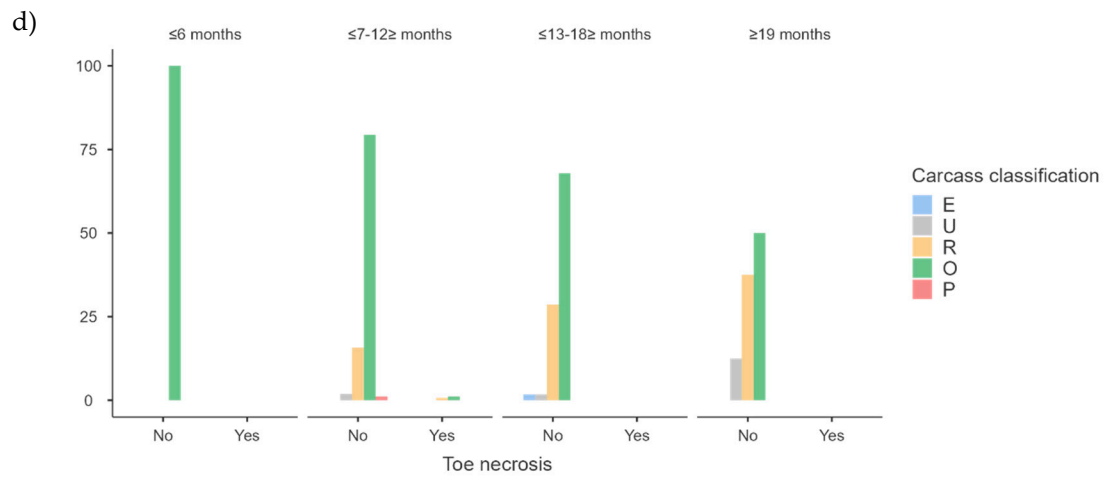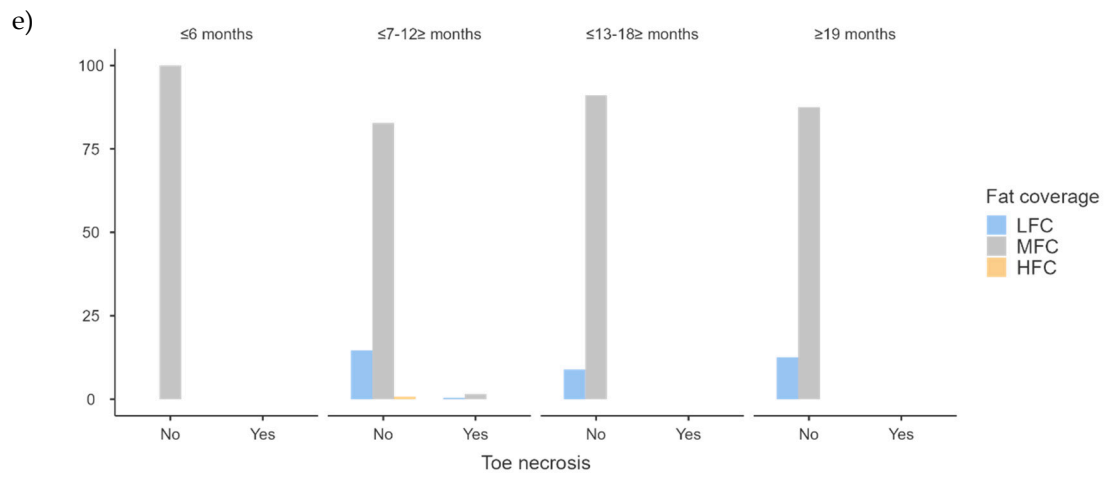

Supplement: s1 [file s1]
